# Supplementary material for: Anti-Inflammatory Functions of Protein C Require RAGE and ICAM-1 in a Stimulus-Dependent Manner
Source: Hindawi journal article supplement (doi:10.1155/2014/743678), 2014-01-01
Supplement: f1 [file 743678.f1.zip]

## Supplemental Material

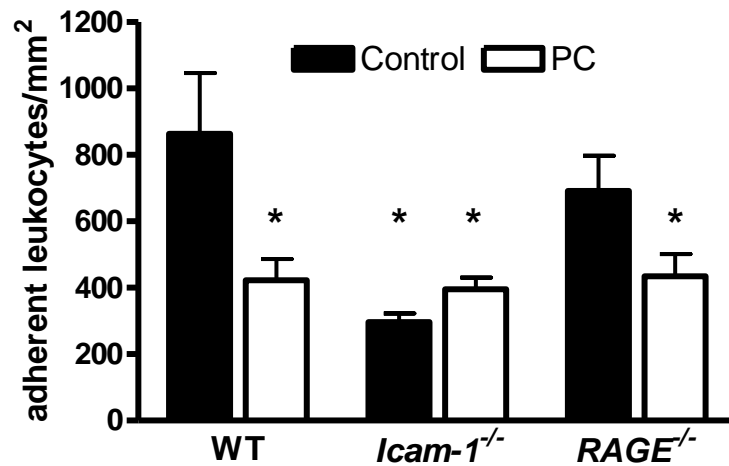

**Supplemental Fig. 1. Effect of PC on CXCL1-induced leukocyte adhesion in wild-type (WT), *RAGE*<sup>-/-</sup> - and *Icam-1*<sup>-/-</sup> mice.** Leukocyte adhesion (number of adherent cells per mm<sup>2</sup> of surface area) in cremaster muscle venules after systemic administration of 600 ng CXCL1 (KC) of wild-type (WT) control mice, *RAGE*<sup>-/-</sup> mice and *Icam-1*<sup>-/-</sup> mice treated with and without treatment with PC (100 U/kg, 3 hours) during trauma-induced inflammation. All values are presented as mean  $\pm$  SEM from three or more mice per group. Significant differences ( $P < 0,05$ ) to WT control mice are indicated by the asterisks.

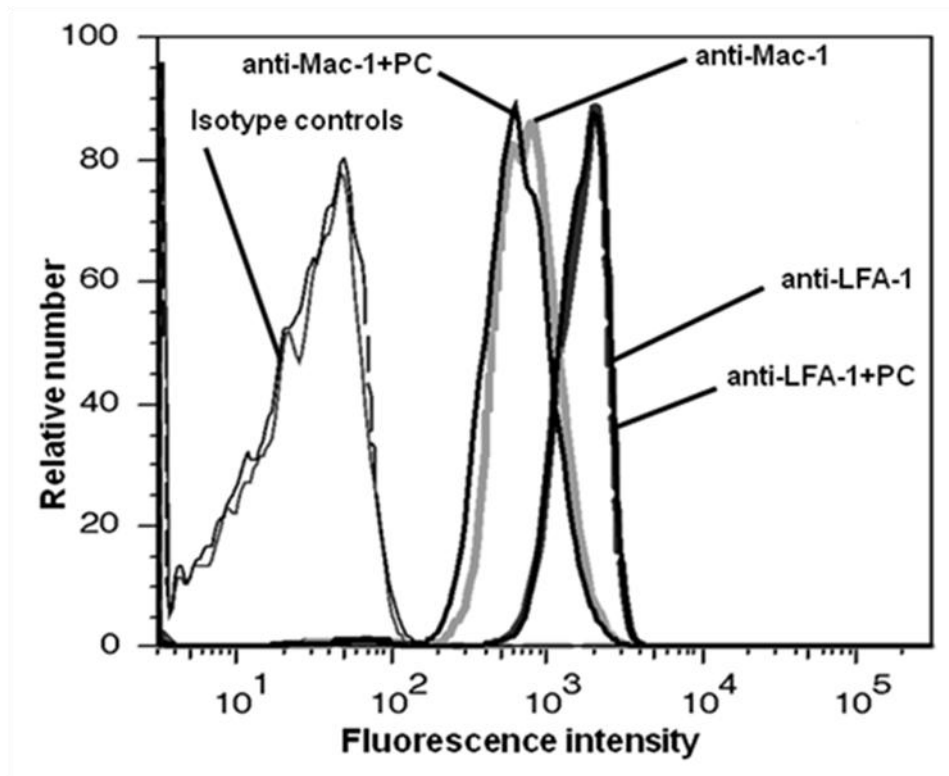

**Supplemental Figure 2: Effect of PC on expression of LFA-1 and Mac-1 on neutrophils.** Surface expression of LFA-1 and Mac-1 on bone marrow-derived neutrophils with or without PC pre-incubation (5 U per  $10^6$  leukocytes/ml, 3 h at 37°C) was compared to respective isotype controls. Representative histograms are shown from 3 separate experiments.

**Supplemental Table 1: Hemodynamic parameters during intravital microscopic experiments**

|                                                                                                               | <u>Mice</u> | <u>Venules</u> | <u>Diameter</u>   | <u>Centerline Velocity</u> | <u>Wall Shear Rate</u> | <u>Systemic Leukocyte Counts</u> |
|---------------------------------------------------------------------------------------------------------------|-------------|----------------|-------------------|----------------------------|------------------------|----------------------------------|
|                                                                                                               | N           | n              | ( $\mu\text{m}$ ) | ( $\mu\text{m/s}$ )        | ( $\text{s}^{-1}$ )    | (/ $\mu\text{l}$ )               |
| <u>Trauma-induced inflammation Genotype/Treatment (3 hours 100 U/kg PC)</u>                                   |             |                |                   |                            |                        |                                  |
| WT                                                                                                            | 10          | 20             | $30 \pm 1$        | $2500 \pm 100$             | $1900 \pm 100$         | $7300 \pm 300$                   |
| WT PC                                                                                                         | 10          | 20             | $31 \pm 1$        | $2700 \pm 100$             | $2200 \pm 100$         | $6200 \pm 400$                   |
| <i>Icam-1</i> <sup>-/-</sup>                                                                                  | 11          | 25             | $30 \pm 1$        | $2300 \pm 100$             | $2000 \pm 100$         | $8000 \pm 1000$                  |
| <i>Icam-1</i> <sup>-/-</sup> PC                                                                               | 13          | 32             | $31 \pm 1$        | $2300 \pm 100$             | $1800 \pm 100$         | $9500 \pm 500$                   |
| <i>RAGE</i> <sup>-/-</sup>                                                                                    | 12          | 30             | $30 \pm 1$        | $2500 \pm 100$             | $2100 \pm 100$         | $7000 \pm 700$                   |
| <i>RAGE</i> <sup>-/-</sup> PC                                                                                 | 11          | 25             | $29 \pm 1$        | $2400 \pm 100$             | $2000 \pm 100$         | $7400 \pm 900$                   |
|                                                                                                               |             |                | n.s.              | n.s.                       | n.s.                   | n.s.                             |
| <u>TNF<math>\alpha</math>-induced inflammation Genotype/Treatment (3 hours 100 U/kg PC) pre and post fMLP</u> |             |                |                   |                            |                        |                                  |
| WT                                                                                                            | 10          | 58             | $29 \pm 1$        | $2000 \pm 100$             | $1900 \pm 100$         | $4100 \pm 500$                   |
| WT PC                                                                                                         | 11          | 60             | $28 \pm 1$        | $2100 \pm 100$             | $1700 \pm 100$         | $3900 \pm 200$                   |
| <i>Icam-1</i> <sup>-/-</sup>                                                                                  | 7           | 40             | $31 \pm 1$        | $1900 \pm 100$             | $1700 \pm 100$         | $4400 \pm 500$                   |
| <i>Icam-1</i> <sup>-/-</sup> PC                                                                               | 11          | 44             | $31 \pm 1$        | $2000 \pm 50$              | $1800 \pm 100$         | $4200 \pm 300$                   |
| <i>RAGE</i> <sup>-/-</sup>                                                                                    | 11          | 49             | $29 \pm 1$        | $2200 \pm 100$             | $2000 \pm 100$         | $3600 \pm 200$                   |
| <i>RAGE</i> <sup>-/-</sup> PC                                                                                 | 12          | 62             | $29 \pm 1$        | $2200 \pm 100$             | $1900 \pm 100$         | $3800 \pm 200$                   |
|                                                                                                               |             |                | n.s.              | n.s.                       | n.s.                   | n.s.                             |

Vessel diameter, centerline velocity and wall shear rate of surgically prepared cremaster muscle venules (Trauma) and tumor necrosis factor $\alpha$  (TNF $\alpha$ )-stimulated (pre and post fMLP-superfusion) cremaster muscle venules of wild-type (WT), *Icam1*<sup>-/-</sup> - and *RAGE*<sup>-/-</sup> mice with and without PC are presented as mean  $\pm$  SEM.

n.s., not significant.
