# Supplementary material for: Anti-Inflammatory Functions of Protein C Require RAGE and ICAM-1 in a Stimulus-Dependent Manner
Source: Mediators Inflamm. 2014 May 4;2014:743678. doi: 10.1155/2014/743678 (PMC4024424; doi:10.1155/2014/743678)
Supplement: Supplementary file 1 — Activation of human protein C was analyzed as previously described [24] with some modifications. Briefly, mice were injected with 100 U/kg of human protein C into the tail vein. As positive controls, 50 mU human α-thrombin (Hemochrom Diagnostica, Essen, Germany) was additionally injected 10 minutes prior to blood sampling in some experiments. 30 minutes after PC, blood was drawn as a final blood sample by heart puncture into 0.38% sodium citrate and 50 mM benzamidin HCl. Human activated protein C was captured from these plasma samples using the HAPC1555 antibody (kindly provided by C. T. Esmon, Oklahoma Medical Research Foundation, Oklahoma City, USA), which is a highly specific mouse monoclonal antibody against human aPC, developed by standard techniques [25]. Due to the antibodies capacity for capturing from plasma, the direct detection of aPC plasma-concentrations is possible [25]. The activity of the captured human PC was determined using a chromogenic substrate (PCa, American Diagnostic) [26]. [file 743678.f1.zip]

Archive with 4 entries (3 files):
- 743678.f1/
- 743678.f1/mat.743678.v1.pdf
- 743678.f1/mat.743678.v2.pdf
- 743678.f1/mat.743678.v3.pdf
